# Supplementary material for: Controlling achiral and chiral conformations of benzyl alcohol by ortho-halogenation, collisional relaxation and dimerisation
Source: Royal Society of Chemistry journal article supplement (doi:10.1039/d4cp03203a), 2024-01-01
Supplement: d4cp03203a1.pdf [file d4cp03203a1.pdf]

**Supporting Information:**

**Controlling achiral and chiral  
conformations of benzyl alcohol by  
ortho-halogenation, collisional  
relaxation and dimerisation**

E. Sennert, M. A. Suhm\*

E-mail: [msuhm@gwdg.de](mailto:msuhm@gwdg.de)

---

# Contents

|                                                                          |             |
|--------------------------------------------------------------------------|-------------|
| <b>List of Figures</b>                                                   | <b>S-1</b>  |
| <b>List of Tables</b>                                                    | <b>S-2</b>  |
| <b>1 Theoretical results</b>                                             | <b>S-3</b>  |
| 1.1 Keywords . . . . .                                                   | S-3         |
| 1.2 Influence of isotope masses on ORCA frequency calculations . . . . . | S-4         |
| 1.3 Monomer coordinates . . . . .                                        | S-4         |
| 1.4 Electronic energy of the monomers . . . . .                          | S-7         |
| 1.5 Transitions states: Cl monomers . . . . .                            | S-8         |
| 1.6 NCI analysis of the Tt monomer. . . . .                              | S-9         |
| 1.7 Dimer coordinates . . . . .                                          | S-10        |
| 1.8 Calculated wavenumbers for Cl, Br and I dimers . . . . .             | S-14        |
| 1.9 Transitions states: Cl dimers . . . . .                              | S-14        |
| <b>2 Experimental results</b>                                            | <b>S-20</b> |
| 2.1 Measurement conditions . . . . .                                     | S-20        |
| 2.2 Experimental and calculated band positions . . . . .                 | S-20        |
| <b>References</b>                                                        | <b>S-22</b> |

## List of Figures

|                                                                                                                                                  |      |
|--------------------------------------------------------------------------------------------------------------------------------------------------|------|
| S1 Electronic energies for monomer conformers at B3LYP-D3(BJ)/def2-QZVP and<br>DLPNO-CCSD(T)/aug-cc-pVQZ//B3LYP-D3(BJ)/def2-QZVP level . . . . . | S-7  |
| S2 Transition state structures for the Cl monomers . . . . .                                                                                     | S-8  |
| S3 NCI images of Tt for B and Cl . . . . .                                                                                                       | S-9  |
| S4 Comparison between the calculated band positions of Cl, Br and I dimer . . . . .                                                              | S-14 |
| S5 Transition state structures for the Cl dimers . . . . .                                                                                       | S-15 |
| S6 Cl dimer and transition state energies . . . . .                                                                                              | S-19 |

---

|    |                                                            |      |
|----|------------------------------------------------------------|------|
| S7 | Cl, Br and I dimer and transition state energies . . . . . | S-19 |
|----|------------------------------------------------------------|------|

## List of Tables

|     |                                                                         |      |
|-----|-------------------------------------------------------------------------|------|
| S1  | Applied ORCA Keywords . . . . .                                         | S-3  |
| S2  | Influence of isotope masses on frequency calculation in ORCA . . . . .  | S-4  |
| S3  | xyz coordinates for Cl G'g . . . . .                                    | S-5  |
| S4  | xyz coordinates for Cl Tg . . . . .                                     | S-5  |
| S5  | xyz coordinates for Tt . . . . .                                        | S-6  |
| S6  | xyz coordinates for G'g to Tg transition state . . . . .                | S-8  |
| S7  | xyz coordinates for Tg to Tt transition state . . . . .                 | S-9  |
| S8  | xyz coordinates for Cl Hom . . . . .                                    | S-10 |
| S9  | xyz coordinates for Cl HomA . . . . .                                   | S-11 |
| S10 | xyz coordinates for Cl Het . . . . .                                    | S-12 |
| S11 | xyz coordinates for Cl HetA . . . . .                                   | S-13 |
| S12 | xyz coordinates for HomA to Hom transition state . . . . .              | S-16 |
| S13 | xyz coordinates for HetA to Het transition state . . . . .              | S-17 |
| S14 | xyz coordinates for Het to Hom transition state . . . . .               | S-18 |
| S15 | Measurement conditions . . . . .                                        | S-20 |
| S16 | Comparison between experimental and calculated band positions . . . . . | S-21 |

---

# 1 Theoretical results

## 1.1 Keywords

**Tab. S1:** Applied keywords in ORCA 5.0.3<sup>S1</sup> for electronic structure optimisations (superscript ES), single point calculations (SP), reaction path optimisations (RP), transition state searches (TS) and relaxed scans (RS).

| Level of approximation                  | Applied keywords                                                                                                                                                                |
|-----------------------------------------|---------------------------------------------------------------------------------------------------------------------------------------------------------------------------------|
| B97-3c <sup>ES</sup>                    | B97-3c abc Opt                                                                                                                                                                  |
| B3LYP-D3(BJ)/def2-TZVP <sup>ES</sup>    | B3LYP D3BJ def2-TZVP abc defgrid3 UseSym<br>VERYTIGHTSCF TIGHTOPT FREQ                                                                                                          |
| B3LYP-D3(BJ)/def2-QZVP <sup>ES</sup>    | B3LYP D3BJ def2-QZVP abc defgrid3 UseSym<br>VERYTIGHTSCF TIGHTOPT FREQ                                                                                                          |
| DLPNO-CCSD(T)/aug-cc-pVQZ <sup>SP</sup> | DLPNO-CCSD(T) TightPNO aug-cc-pVQZ<br>aug-cc-pVQZ/C TIGHTSCF<br>additional for structures including iodine:<br>Basis sets: aug-cc-pVQZ-PP aug-cc-pVQZ-PP/C<br>ECP: SK-MCDHF-RSC |
| NEB-CI/B97-3c <sup>RP</sup>             | NEB-CI B97-3c abc                                                                                                                                                               |
| NEB-CI/B3LYP <sup>RP</sup>              | NEB-CI B3LYP D3BJ def2-TZVP abc defgrid3<br>VERYTIGHTSCF                                                                                                                        |
| TS-B97-3c <sup>TS</sup>                 | B97-3c abc defgrid3 UseSym OptTS<br>VERYTIGHTSCF TIGHTOPT FREQ                                                                                                                  |
| TS-B3LYP-D3(BJ)/def2-TZVP <sup>TS</sup> | B3LYP D3BJ def2-TZVP abc defgrid3 UseSym<br>OptTS VERYTIGHTSCF TIGHTOPT FREQ                                                                                                    |
| TS-B3LYP-D3(BJ)/def2-QZVP <sup>TS</sup> | B3LYP D3BJ def2-QZVP abc defgrid3 UseSym<br>OptTS VERYTIGHTSCF TIGHTOPT FREQ                                                                                                    |
| Relaxed Scan <sup>RS</sup>              | B97-3c abc defgrid3 TIGHTOPT                                                                                                                                                    |

## 1.2 Influence of isotope masses on ORCA frequency calculations

There are small effects from the choice of masses in the harmonic frequency calculations - table S2 exemplifies the influence of the used atom masses on the calculated OH stretching frequencies and IR intensities in ORCA 5.0.3<sup>S1</sup>. The calculated OH stretching wavenumbers and IR intensities of the homochiral dimer Tg-G'g (Hom) are shown. For the purposes of this work, the used masses have a negligibly small influence on the wavenumber and on the IR intensity. For OH wavenumbers, the dominant effect is the mass used for H. This work uses the default ORCA option for all calculations.

**Tab. S2:** Comparison between calculated OH stretching wavenumbers and intensities using different isotope mass options in ORCA 5.0.3<sup>S1</sup> for the atoms in the homochiral dimers. The default option uses an abundance weighted isotope mass which is not the most logical choice in particular for H, while the keyword "Mass2016" uses the mass of the most abundant isotopes. D is short for H-bond donor and A short for H-bond acceptor. The mass change in H from the default (1.008 00 g mol<sup>-1</sup>) to the Mass2016 value (1.007 83 g mol<sup>-1</sup>) has a small, but larger effect on OH than the halogen isotope mass due to the local mode character.

| Isotope             | ORCA option   | $M$<br>g mol <sup>-1</sup> | $\omega_D$<br>cm <sup>-1</sup> | $I_D$<br>km mol <sup>-1</sup> | $\omega_A$<br>cm <sup>-1</sup> | $I_A$<br>km mol <sup>-1</sup> |
|---------------------|---------------|----------------------------|--------------------------------|-------------------------------|--------------------------------|-------------------------------|
| <sup>35/37</sup> Cl | default       | 35.45300                   | 3618.11                        | 424                           | 3778.43                        | 38                            |
| <sup>35</sup> Cl    | Mass2016      | 34.96885                   | 3618.44                        | 424                           | 3778.77                        | 38                            |
| <sup>37</sup> Cl    | Cl M=36.96590 | 36.96590                   | 3617.94                        | 424                           | 3778.43                        | 38                            |
| <sup>79/81</sup> Br | default       | 79.90000                   | 3615.00                        | 435                           | 3762.93                        | 44                            |
| <sup>79</sup> Br    | Mass2016      | 78.91834                   | 3615.32                        | 435                           | 3763.27                        | 44                            |
| <sup>81</sup> Br    | Br M=80.91690 | 80.91690                   | 3614.91                        | 435                           | 3763.01                        | 44                            |
| <sup>127</sup> I    | default       | 126.90000                  | 3615.10                        | 445                           | 3746.49                        | 51                            |
| <sup>127</sup> I    | Mass2016      | 126.90447                  | 3615.42                        | 446                           | 3746.83                        | 51                            |

## 1.3 Monomer coordinates

The xyz files for the Cl monomer structures (fig. 5 in the main publication) are listed in table S3, table S4 and table S5.

**Tab. S3:** xyz coordinates for Cl G'g at B3LYP-D3(BJ)/def2-QZVP level.

| atom | x                 | y                 | z                 |
|------|-------------------|-------------------|-------------------|
| C    | -0.26356394161413 | 2.55986789658523  | 0.38918593290787  |
| C    | 0.79330883391519  | 1.67960319390225  | 0.57869819596818  |
| C    | -1.49946842199014 | 2.07591900092384  | -0.01823714476380 |
| H    | 1.75819397651596  | 2.05569162735164  | 0.89099191308363  |
| C    | 0.64804980654549  | 0.30886979891708  | 0.37366528184901  |
| C    | -1.67469683693171 | 0.71522379209413  | -0.23439519179916 |
| H    | -2.62801699907890 | 0.32130718147868  | -0.55259977080197 |
| C    | -0.60561043558444 | -0.14433310528653 | -0.03587133580298 |
| H    | -0.12179957547987 | 3.61792634182667  | 0.55619923837629  |
| C    | 1.81085653617864  | -0.62903983842819 | 0.58066105902757  |
| H    | 2.63033071860540  | -0.08644239919690 | 1.04653632910369  |
| H    | 1.51870881259062  | -1.43918609472764 | 1.25479101680001  |
| O    | 2.33469361613215  | -1.15406265216531 | -0.63467107750411 |
| H    | 1.67500574337499  | -1.74052097179955 | -1.01688052691498 |
| H    | -2.32925903445702 | 2.75110639186627  | -0.17077633179049 |
| Cl   | -0.85810000791810 | -1.85849917232778 | -0.31902910648024 |

**Tab. S4:** xyz coordinates for Cl Tg at B3LYP-D3(BJ)/def2-QZVP level.

| atom | x                 | y                 | z                 |
|------|-------------------|-------------------|-------------------|
| C    | -0.09003758677876 | 2.45775345492351  | 0.00092862736373  |
| C    | 0.90972292802244  | 1.49466186226011  | 0.04749704058780  |
| C    | -1.42300760906610 | 2.07324080337745  | -0.04854862492717 |
| H    | 1.94760890585187  | 1.78801946184497  | 0.10084693005809  |
| C    | 0.60662693243082  | 0.13530559351958  | 0.04253447763974  |
| C    | -1.75263589387483 | 0.72443313426295  | -0.04614619456897 |
| H    | -2.78273051873216 | 0.40316918052768  | -0.07931063329415 |
| C    | -0.74075413930195 | -0.22256677870864 | 0.00095650290541  |
| H    | 0.17341401980437  | 3.50580790220178  | 0.00698730790658  |
| C    | 1.69547278293382  | -0.91395853450950 | 0.09157077892117  |
| H    | 1.66728983436190  | -1.42342113830185 | 1.05557886469699  |
| H    | 1.50217011857752  | -1.67566728099788 | -0.66808762360990 |
| O    | 3.00661814598101  | -0.39038823810023 | -0.03376521729313 |
| H    | 3.14478198044050  | -0.10878534091576 | -0.94167391632035 |
| H    | -2.20782381567952 | 2.81510211443626  | -0.08579380573214 |
| Cl   | -1.18755374723000 | -1.91650732649196 | 0.01879935899581  |

---

**Tab. S5:** xyz coordinates for Cl Tt at B3LYP-D3(BJ)/def2-QZVP level.

| atom | x                 | y                 | z                 |
|------|-------------------|-------------------|-------------------|
| C    | -0.06279399695562 | 2.45159890586220  | -0.00317602415922 |
| C    | 0.93024600224593  | 1.48061017871958  | 0.00748042227990  |
| C    | -1.40069109430308 | 2.08117123352762  | -0.01565072811524 |
| H    | 1.97184224167443  | 1.76038460446624  | 0.01716120748863  |
| C    | 0.61007663166593  | 0.12519375542965  | 0.00594215878585  |
| C    | -1.74449124172957 | 0.73596877755484  | -0.01737707157947 |
| H    | -2.77801845291238 | 0.42457905835364  | -0.02695785983318 |
| C    | -0.74070967094168 | -0.22014966137311 | -0.00660657105602 |
| H    | 0.21080944871053  | 3.49708062902527  | -0.00175186380777 |
| C    | 1.67515974693176  | -0.93679490362115 | 0.01735607898366  |
| H    | 1.53789842988232  | -1.57337904745093 | 0.89777959577379  |
| H    | 1.55300300897641  | -1.57717506930959 | -0.86252786585000 |
| O    | 2.95954860380586  | -0.32991694483273 | 0.02701106904131  |
| H    | 3.62342024445683  | -1.02169996874639 | 0.03747756268070  |
| H    | -2.17851418626149 | 2.83131067028230  | -0.02404813949439 |
| Cl   | -1.19961734928992 | -1.91132774984138 | -0.00887015127111 |

## 1.4 Electronic energy of the monomers

Supplementary to fig. 7 in the main publication the electronic energy order of the B, Cl, Br and I monomers at B3LYP-D3(BJ)/def2-QZVP and DLPNO-CCSD(T)/aug-cc-pVQZ//B3LYP-D3(BJ)/def2-QZVP level can be found in fig. S1.

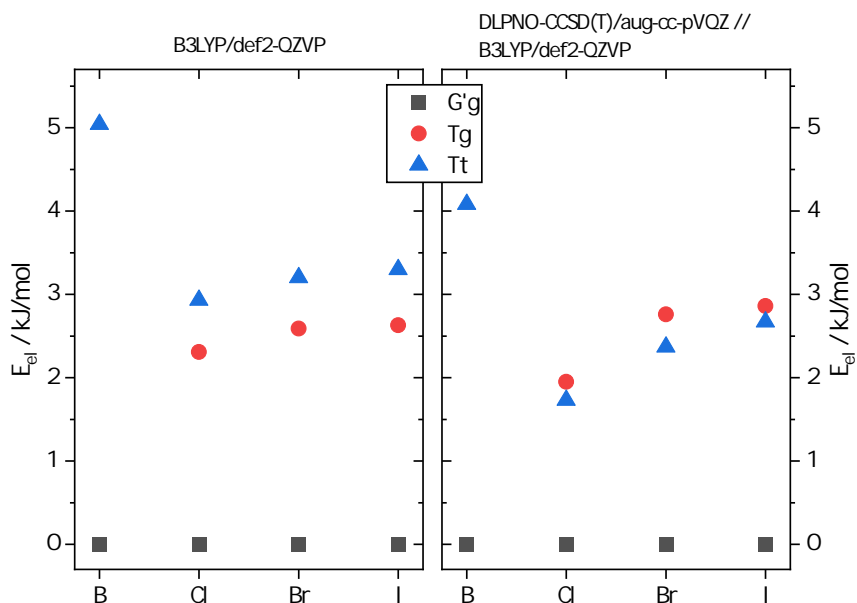

**Fig. S1:** Computed electronic energy order of the monomer conformers for B, Cl, Br, I calculated at B3LYP-D3(BJ)/def2-QZVP level (left) compared to results from calculations at DLPNO-CCSD(T)/aug-cc-pVQZ//B3LYP-D3(BJ)/def2-QZVP level (right).



---

## 1.5 Transitions states: Cl monomers

In fig. S2 the structures of the two transition states of the Cl monomer are shown. The respective xyz coordinates can be found in table S6 and table S7.

(a) G'g to Tg; low. frequ.  $-54.63 \text{ cm}^{-1}$

(b) Tg to Tt; low. frequ.  $-235.88 \text{ cm}^{-1}$

**Fig. S2:** Transition states for the Cl monomers G'g to Tg (a) and Tg to Tt (b) including lowest calculated frequency, calculated at B3LYP-D3(BJ)/def2-QZVP level. Depending on the pdf reader, the imaginary normal coordinate may be animated.

**Tab. S6:** xyz coordinates for the Cl transition state between G'g and Tg at B3LYP-D3(BJ)/def2-QZVP level.

| atom | x                 | y                 | z                 |
|------|-------------------|-------------------|-------------------|
| C    | -0.12560725391299 | 2.46718365442167  | 0.32952085702289  |
| C    | 0.87524287624216  | 1.51716747804520  | 0.44144624380472  |
| C    | -1.42758521680969 | 2.06624805609881  | 0.04765583074461  |
| H    | 1.89171954891752  | 1.82056956374081  | 0.65112041441248  |
| C    | 0.61636669206772  | 0.15341244060977  | 0.27744596732909  |
| C    | -1.71519247525959 | 0.72162313233251  | -0.12151164699078 |
| H    | -2.71921640426390 | 0.39260422744577  | -0.34223275144068 |
| C    | -0.69625193049880 | -0.21848152660485 | -0.00760144962511 |
| H    | 0.10474902157712  | 3.51437647912596  | 0.46333312484983  |
| C    | 1.76293501945022  | -0.82161979853466 | 0.39539379045583  |
| H    | 2.21314868324065  | -0.73864478129525 | 1.38412734039236  |
| H    | 1.41270942483532  | -1.84505483315173 | 0.27413432542839  |
| O    | 2.81981971369230  | -0.53057291262237 | -0.51906742151223 |
| H    | 2.47489719151233  | -0.59913207773368 | -1.41357508548660 |
| H    | -2.21915909956154 | 2.79664613006764  | -0.04077581509348 |
| Cl   | -1.12805140324279 | -1.90188883716859 | -0.24012566704117 |

**Tab. S7:** xyz coordinates for the CI transition state between Tg and Tt at B3LYP-D3(BJ)/def2-QZVP level.

| atom | x                 | y                 | z                 |
|------|-------------------|-------------------|-------------------|
| C    | -0.04522060363027 | 2.45548317419586  | -0.02726127260654 |
| C    | 0.93822827129485  | 1.47620641205937  | 0.02811619977353  |
| C    | -1.38468650828294 | 2.09521595922211  | -0.08734474167142 |
| H    | 1.98196672130306  | 1.74498164159543  | 0.07806659869446  |
| C    | 0.60846265511637  | 0.12366751851149  | 0.02543386041027  |
| C    | -1.73886969308490 | 0.75260987001692  | -0.09095110121048 |
| H    | -2.77379318466811 | 0.44924172378054  | -0.13835893756193 |
| C    | -0.74373556666790 | -0.21098325598128 | -0.03330546786362 |
| H    | 0.23642427576202  | 3.49884646330196  | -0.02235198290229 |
| C    | 1.66963699204900  | -0.94761722228484 | 0.09501748613874  |
| H    | 1.49275623155779  | -1.56989487000448 | 0.97637849489755  |
| H    | 1.57748917297166  | -1.60469539226905 | -0.77265738333834 |
| O    | 2.97558327049199  | -0.39052315572275 | 0.17841222258395  |
| H    | 3.51872293642907  | -0.75079294764508 | -0.52256776008268 |
| H    | -2.15566362680780 | 2.85116713338862  | -0.13108103555064 |
| Cl   | -1.21555480792404 | -1.89905676124672 | -0.04090739142321 |

## 1.6 NCI analysis of the Tt monomer.

In fig. S3 the NCI<sup>S2</sup> analysis, with a reduced density gradient (RDG) value of 0.5 au and the blue-green-red (attractive, van der Waals, repulsive) color scheme ranging from  $-0.04$  to  $0.02$  au, of the B and Cl Tt monomer is compared. The additional observed attractive interaction between the benzyl group and the Cl (or halogen in general) could be a reason for the planarity of the ortho-halogenated benzyl alcohols.

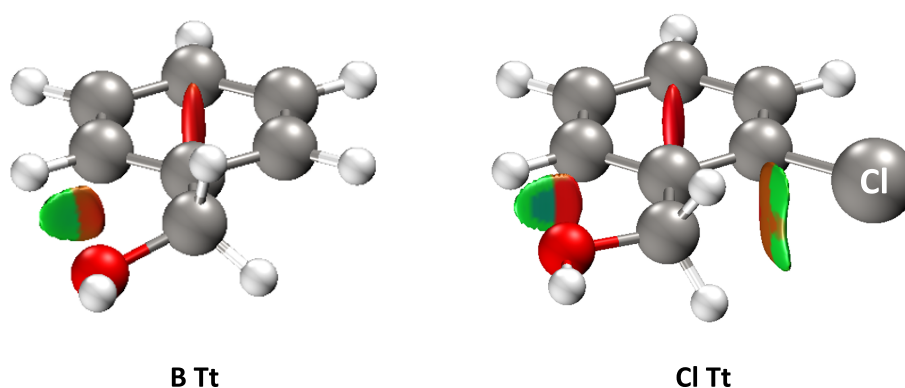

**Fig. S3:** Comparison between the B and Cl Tt monomers using noncovalent interaction analysis (NCI<sup>S2</sup>). The visualisation was done using MultiWFN<sup>S3</sup> and VMD<sup>S4</sup>.

## 1.7 Dimer coordinates

The xyz files for the Cl dimer structures (fig. 9 in the main publication) are listed in table S8, table S9, table S10 and table S11.

**Tab. S8:** xyz coordinates for Cl Hom at B3LYP-D3(BJ)/def2-QZVP level.

| atom | x                 | y                 | z                 |
|------|-------------------|-------------------|-------------------|
| C    | -1.80559300564391 | 0.01272881430551  | -1.90912049605568 |
| C    | -2.24844229255701 | 0.62107034222368  | -0.74280331664316 |
| C    | -1.19401842540587 | -1.23074477369157 | -1.84688766858839 |
| H    | -2.71668281737832 | 1.59518051988450  | -0.78733480770527 |
| C    | -2.09652414186551 | 0.00916482406188  | 0.49924763974812  |
| C    | -1.02872012017784 | -1.86586891734046 | -0.62380189623559 |
| H    | -0.53899480114205 | -2.82448907521848 | -0.55734233621538 |
| C    | -1.48033708168561 | -1.24147561396801 | 0.52577865213703  |
| H    | -1.92030327910670 | 0.51503342805130  | -2.85788397980297 |
| C    | -2.56706653645900 | 0.69417656381962  | 1.75410009319505  |
| H    | -3.09825249329543 | 1.60662559814914  | 1.49612576708420  |
| H    | -3.25066001000079 | 0.04905648647605  | 2.30961425220060  |
| O    | -1.48994303132909 | 1.09964743291135  | 2.60795713909731  |
| H    | -1.09600375417798 | 0.30523705800854  | 2.98413370585822  |
| H    | -0.82774549475388 | -1.70428880011075 | -2.74585023557377 |
| C    | 2.29020334128858  | -1.25120748013698 | 0.80036612031520  |
| C    | 1.76881566849137  | 0.01654044697360  | 1.01951253940885  |
| C    | 2.55579371217629  | -1.67846070193044 | -0.49352376997864 |
| H    | 1.57735953070071  | 0.36463936997107  | 2.02319079274209  |
| C    | 1.49128053331332  | 0.88087985652340  | -0.03538961851971 |
| C    | 2.29676987144506  | -0.83342979537859 | -1.56425072174939 |
| H    | 2.49756015507560  | -1.14259861015689 | -2.57901848663960 |
| C    | 1.76847690519729  | 0.42521050429579  | -1.32326016624750 |
| H    | 2.48951890355633  | -1.90231059202439 | 1.63938122472840  |
| C    | 0.91719501070162  | 2.26122174453832  | 0.20716985294094  |
| H    | 1.61068495497975  | 3.00642861330584  | -0.18610800989510 |
| H    | -0.00490116203037 | 2.36213831509340  | -0.37419449126120 |
| O    | 0.70787766707046  | 2.57171907443687  | 1.56321453232967  |
| H    | -0.08201847089871 | 2.10886647255209  | 1.88573678021257  |
| H    | 2.96611844133015  | -2.66176046965359 | -0.67476544100216 |
| Cl   | -1.24720655645316 | -2.06002900752398 | 2.06072325776845  |
| Cl   | 1.44543868172951  | 1.46507886388258  | -2.69643110908173 |

---

**Tab. S9:** xyz coordinates for Cl HomA at B3LYP-D3(BJ)/def2-QZVP level.

| atom | x                 | y                 | z                 |
|------|-------------------|-------------------|-------------------|
| C    | -2.28221205831985 | -2.60029178723382 | 0.43553445586544  |
| C    | -2.48272452440721 | -1.49114874389556 | 1.24681979179323  |
| C    | -0.99080202027648 | -2.99317033784915 | 0.11336124293851  |
| H    | -3.48819084223227 | -1.17439985797868 | 1.48847448711974  |
| C    | -1.41171316449374 | -0.76011573117789 | 1.75518409161483  |
| C    | 0.09616297240223  | -2.28098793412944 | 0.60231221870290  |
| H    | 1.10514292966487  | -2.56343915918669 | 0.34562075761126  |
| C    | -0.12566814616706 | -1.18100688213526 | 1.41380344160939  |
| H    | -3.13012546507962 | -3.14765340724011 | 0.05019829718612  |
| C    | -1.64893878602198 | 0.45568388226700  | 2.60954129162658  |
| H    | -2.70314597209627 | 0.52486206693011  | 2.86479975196291  |
| H    | -1.07673014614212 | 0.39080858244882  | 3.53691087826391  |
| O    | -1.33243946679809 | 1.67650814791715  | 1.93038329989894  |
| H    | -0.37745590473558 | 1.70979558533577  | 1.80008434440803  |
| H    | -0.82168992574284 | -3.84508441058605 | -0.52895551803498 |
| C    | 2.00019599253685  | 2.62519922761522  | -0.42495617106960 |
| C    | 0.64594616481614  | 2.39090908472901  | -0.62598862317755 |
| C    | 2.93898144289226  | 1.71386845297334  | -0.88881491104774 |
| H    | -0.08923576816970 | 3.10434654185057  | -0.28358475425079 |
| C    | 0.19455860816242  | 1.24901337116841  | -1.28456974335226 |
| C    | 2.51785445620407  | 0.57914141970430  | -1.56838433692622 |
| H    | 3.23029446942686  | -0.13645067911182 | -1.95043352284358 |
| C    | 1.16148073664032  | 0.36569390279325  | -1.76210943017640 |
| H    | 2.31982353125954  | 3.51999725337628  | 0.09025739860049  |
| C    | -1.28470679539688 | 0.97650145684374  | -1.46208324642853 |
| H    | -1.53293748555076 | 1.00901141589050  | -2.52429005982459 |
| H    | -1.49335157640776 | -0.04395217951752 | -1.12655715824879 |
| O    | -2.12266541334874 | 1.90857864085155  | -0.81974254310311 |
| H    | -1.99020062299260 | 1.83519275743539  | 0.13889393951151  |
| H    | 3.99468794023818  | 1.88324481607940  | -0.73257825230502 |
| Cl   | 1.26273065528043  | -0.29032738830881 | 2.00311958762028  |
| Cl   | 0.66777362103826  | -1.05808421981200 | -2.65637677511872 |

---

**Tab. S10:** xyz coordinates for Cl Het at B3LYP-D3(BJ)/def2-QZVP level.

| atom | x                 | y                 | z                 |
|------|-------------------|-------------------|-------------------|
| C    | 0.65497040903212  | -2.07530464861237 | 1.16563595398278  |
| C    | -0.10910087315635 | -1.23364398750606 | 1.96082104799893  |
| C    | 0.20571065900778  | -2.42219934432776 | -0.09944039920534 |
| H    | 0.25068200461254  | -0.94441990044816 | 2.93868560494375  |
| C    | -1.33345919263339 | -0.73270650800435 | 1.52461908798940  |
| C    | -1.00744062295999 | -1.93405145124414 | -0.56621196808523 |
| H    | -1.36235585199507 | -2.18181167392968 | -1.55435522861839 |
| C    | -1.75833987726295 | -1.10475703442966 | 0.24967095208503  |
| H    | 1.60909535431363  | -2.43359901961049 | 1.52098842809899  |
| C    | -2.14712239416141 | 0.17397548613914  | 2.40929243047359  |
| H    | -3.13889358248892 | -0.25030012672847 | 2.57993328352618  |
| H    | -1.65515877005824 | 0.27740337161070  | 3.37297289917970  |
| O    | -2.27946376830536 | 1.50442822294803  | 1.89378872828859  |
| H    | -2.90105466787532 | 1.47782572794700  | 1.15866689392241  |
| H    | 0.80293906293271  | -3.05734582844232 | -0.73682900294428 |
| C    | 3.27475561330018  | 0.45011598361729  | 1.00338680005131  |
| C    | 2.14367440273410  | 1.24008405393919  | 0.84789518964647  |
| C    | 3.66881565655990  | -0.40868124343075 | -0.01443453737582 |
| H    | 1.82857291067230  | 1.91763345325070  | 1.62702990853120  |
| C    | 1.38187418485827  | 1.19333960035742  | -0.31600339726758 |
| C    | 2.92682478054305  | -0.47347768160351 | -1.18591806776834 |
| H    | 3.21337720364074  | -1.13315878982691 | -1.99117209062617 |
| C    | 1.80022799115629  | 0.32379150530488  | -1.32050678918839 |
| H    | 3.85011522363465  | 0.50893182280019  | 1.91667210747884  |
| C    | 0.15939796361339  | 2.07019999086153  | -0.48597042431468 |
| H    | 0.33024294030069  | 2.74667025571181  | -1.32703422154503 |
| H    | -0.69184528450813 | 1.44349956004761  | -0.76524451330787 |
| O    | -0.13181673109343 | 2.85516325221799  | 0.64709059759865  |
| H    | -0.80245366898397 | 2.39986528166435  | 1.17948573777489  |
| H    | 4.54997008482025  | -1.02489486104125 | 0.09555019341998  |
| Cl   | -3.29108998546593 | -0.50501259363129 | -0.36563952524376 |
| Cl   | 0.88066268639127  | 0.21530444026264  | -2.80863644308467 |

---

**Tab. S11:** xyz coordinates for Cl HetA at B3LYP-D3(BJ)/def2-QZVP level.

| atom | x                 | y                 | z                 |
|------|-------------------|-------------------|-------------------|
| C    | -2.96549032415165 | -0.23936048706513 | 1.97813252031079  |
| C    | -1.73627802665211 | -0.88651628403170 | 1.97732230750437  |
| C    | -3.73404219468248 | -0.20536518527870 | 0.82146305413829  |
| H    | -1.13384793047759 | -0.92503744903583 | 2.87255955145632  |
| C    | -1.24277814256415 | -1.50418845695897 | 0.83127828918952  |
| C    | -3.27194539342594 | -0.82876309756534 | -0.33048202227515 |
| H    | -3.85547050664636 | -0.82202730932587 | -1.23892403570310 |
| C    | -2.04132600365422 | -1.46769779653768 | -0.31039206601849 |
| H    | -3.32365688739636 | 0.23364459509197  | 2.88160867797088  |
| C    | 0.12223670905813  | -2.15918247903751 | 0.82125236359028  |
| H    | 0.01088533061641  | -3.21910173685377 | 0.58691307525988  |
| H    | 0.70896014619439  | -1.72148094186626 | 0.00582862954728  |
| O    | 0.80498572209472  | -2.07269417148718 | 2.04763134156721  |
| H    | 1.14704792544980  | -1.16932544104708 | 2.14581549169316  |
| H    | -4.69169568726139 | 0.29526764210501  | 0.81170927118887  |
| C    | -0.50950525324809 | 1.30622482793051  | -1.85723272404182 |
| C    | -0.35206847887894 | 1.41894005724146  | -0.48303447088390 |
| C    | 0.60348255250143  | 1.33206162335563  | -2.68516512434921 |
| H    | -1.21845428701742 | 1.38167084049043  | 0.16125907068187  |
| C    | 0.90823294233338  | 1.56092905034283  | 0.09395037828958  |
| C    | 1.87257601940607  | 1.47836454754105  | -2.13960536679895 |
| H    | 2.74934739764370  | 1.50252276479865  | -2.76867140888563 |
| C    | 2.00624276057577  | 1.59414610179813  | -0.76559525913586 |
| H    | -1.49693722159473 | 1.17970640683729  | -2.27508562192528 |
| C    | 1.05500559048547  | 1.67465711930373  | 1.58853951009252  |
| H    | 1.54941451069341  | 2.61250340984191  | 1.85202327910743  |
| H    | 0.07114294665655  | 1.66774487040480  | 2.04920891182455  |
| O    | 1.76723402954298  | 0.57960278002547  | 2.17720117788616  |
| H    | 2.68454780327282  | 0.62796081129234  | 1.88782164876481  |
| H    | 0.49202752865030  | 1.23362266698041  | -3.75532235768045 |
| Cl   | -1.47534004994019 | -2.22338039678347 | -1.78391786675899 |
| Cl   | 3.62324645823732  | 1.79470233207007  | -0.10607788167525 |

## 1.8 Calculated wavenumbers for Cl, Br and I dimers

A comparison between the calculated band positions of the Cl, Br and I Hom and Het dimers is shown in fig. S4.

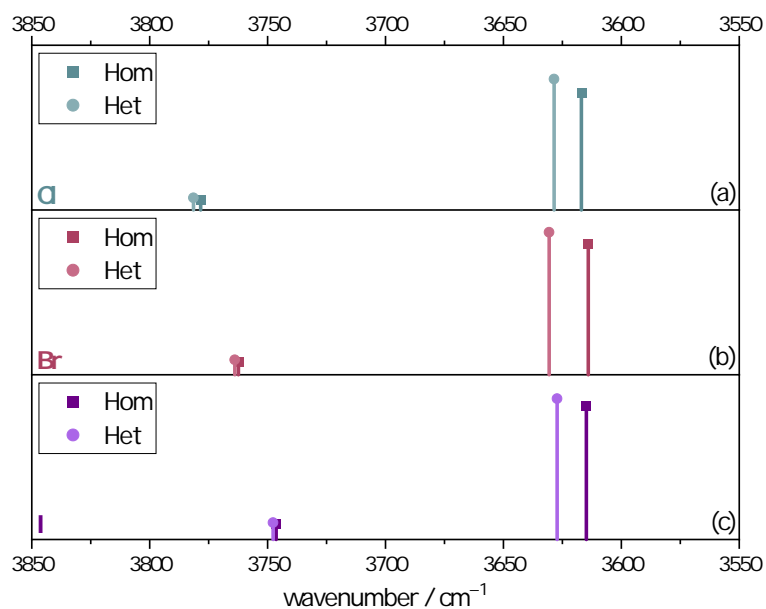

**Fig. S4:** Comparison between the calculated harmonic wavenumbers and intensities for the Hom and Het dimer conformers of Cl, Br, I, calculated at B3LYP-D3(BJ)/def2-QZVP level.

## 1.9 Transitions states: Cl dimers

In fig. S5 the structures of the three transition states of the Cl dimer are shown. The respective xyz coordinates can be found in table S12, table S13 and table S14. The height of the barriers between the Cl dimers are shown in fig. S6 and a comparison between the barriers of Cl, Br and I dimers in fig. S7.

---

(a) HomA to Hom; low. frequ.  $-17.78 \text{ cm}^{-1}$

(b) HetA to Het; low. frequ.  $-16.62 \text{ cm}^{-1}$

(c) Het to Hom; low. frequ.  $-22.36 \text{ cm}^{-1}$

**Fig. S5:** Transition states for the Cl dimers HomA to Hom (a), HetA to Het (b) and Het to Hom (c) including the lowest calculated frequency, calculated at B3LYP-D3(BJ)/def2-QZVP level. Depending on the pdf reader, the imaginary normal coordinate may be animated.



**Tab. S12:** xyz coordinates for the CI transition state between HomA and Hom at B3LYP-D3(BJ)/def2-QZVP level.

| atom | x                 | y                 | z                 |
|------|-------------------|-------------------|-------------------|
| C    | -1.69451504219236 | -2.62025564185144 | 0.20425224449548  |
| C    | -2.14558003738738 | -1.56449748121505 | 0.98387055837894  |
| C    | -0.33358957906247 | -2.87736330242587 | 0.11330665448974  |
| H    | -3.20479809777644 | -1.35431692289495 | 1.04667818242790  |
| C    | -1.26081993293631 | -0.75325474868517 | 1.69191313212661  |
| C    | 0.57176094371646  | -2.08419234910641 | 0.80413230950724  |
| H    | 1.63368484252402  | -2.26197050166489 | 0.73409724441554  |
| C    | 0.09939792026059  | -1.04090209496670 | 1.58345844852556  |
| H    | -2.40070256535335 | -3.23014975926785 | -0.33992812050704 |
| C    | -1.76805739384185 | 0.39522394028314  | 2.52186913732153  |
| H    | -2.85331050140740 | 0.36261331583093  | 2.57020915370398  |
| H    | -1.37955129737348 | 0.33128460128404  | 3.54028207630669  |
| O    | -1.44308583456845 | 1.67338193487399  | 1.96267146853430  |
| H    | -0.48481416536684 | 1.77374788896384  | 1.98635636556276  |
| H    | 0.03009913953690  | -3.68474987467791 | -0.50489964609295 |
| C    | 2.12539332589475  | 2.17652561585522  | -0.42685875203150 |
| C    | 0.74913306351155  | 2.21030072196522  | -0.60826641734953 |
| C    | 2.87275521463561  | 1.14361559671086  | -0.97532802057118 |
| H    | 0.16128939066371  | 3.01755170698424  | -0.19647571853252 |
| C    | 0.08644336911561  | 1.22363762852500  | -1.33448660284351 |
| C    | 2.24024448623518  | 0.15842071265724  | -1.72182619158801 |
| H    | 2.80274385530715  | -0.64620545104886 | -2.17120570578692 |
| C    | 0.86603273330141  | 0.21509974401179  | -1.89801521138663 |
| H    | 2.61174494536606  | 2.95465869325973  | 0.14413025604367  |
| C    | -1.41922697824125 | 1.24377025618573  | -1.49666243213286 |
| H    | -1.66655755071411 | 1.40827102230397  | -2.54684983701448 |
| H    | -1.80747761658339 | 0.25405575442041  | -1.23777446438203 |
| O    | -2.06517638658777 | 2.25670172186580  | -0.76234161627671 |
| H    | -1.96233539785238 | 2.06864742645061  | 0.18447688080383  |
| H    | 3.94306322952264  | 1.10286377155380  | -0.83248238661818 |
| Cl   | 1.26517082529263  | -0.05785722110687 | 2.44776874955359  |
| Cl   | 0.10522898969938  | -1.02361525346226 | -2.87547777036292 |

**Tab. S13:** xyz coordinates for the CI transition state between HetA and Het at B3LYP-D3(BJ)/def2-QZVP level.

| atom | x                 | y                 | z                 |
|------|-------------------|-------------------|-------------------|
| C    | -0.82880425082705 | 1.63716920064072  | -1.37807998796187 |
| C    | -0.40715818672928 | 1.81358304489793  | -0.06786711414846 |
| C    | 0.09369629212747  | 1.31509135576048  | -2.36254709608330 |
| H    | -1.13233435809195 | 2.03182381448158  | 0.70293034397074  |
| C    | 0.93403707993823  | 1.69074007044519  | 0.28736040421260  |
| C    | 1.43833617804402  | 1.18570304933296  | -2.03960081203872 |
| H    | 2.16951554509666  | 0.93494361981893  | -2.79285209396461 |
| C    | 1.83875733040899  | 1.38197532974813  | -0.72832017870941 |
| H    | -1.87671218983459 | 1.72637676286711  | -1.62024949578549 |
| C    | 1.36773463297717  | 1.89370763568842  | 1.71538343429505  |
| H    | 2.08815899287828  | 2.71246334163584  | 1.78012847829808  |
| H    | 0.50461003633799  | 2.15600378905489  | 2.32143151368482  |
| O    | 1.92557951046643  | 0.72045611737075  | 2.31846427668243  |
| H    | 2.78705092202962  | 0.56048229617742  | 1.91834797651519  |
| H    | -0.22681582156922 | 1.15336970826702  | -3.38127684850079 |
| C    | -3.11200350610439 | -0.23850965993339 | 1.67416665820595  |
| C    | -1.84536458289359 | -0.78923988482122 | 1.82150336215215  |
| C    | -3.75679023709934 | -0.29759222835041 | 0.44546525176588  |
| H    | -1.33831380298338 | -0.75887252539287 | 2.77434314566528  |
| C    | -1.19199592925132 | -1.40023457156816 | 0.75514555892127  |
| C    | -3.13147432831217 | -0.91349955611148 | -0.63076485881416 |
| H    | -3.61496768977860 | -0.97580915286829 | -1.59417731858531 |
| C    | -1.86526921144188 | -1.45275779611799 | -0.46339161181953 |
| H    | -3.59640098086110 | 0.23017307128568  | 2.51929337121173  |
| C    | 0.20337393554040  | -1.96609369696114 | 0.91329769142029  |
| H    | 0.18472674718968  | -3.03176932544357 | 0.67872415955150  |
| H    | 0.85560645093694  | -1.49697183776174 | 0.16886105668313  |
| O    | 0.72841072482362  | -1.83212887558914 | 2.21178022722248  |
| H    | 1.08586770403743  | -0.93546951913456 | 2.31344483179124  |
| H    | -4.74379445925136 | 0.12480915451805  | 0.32109687816962  |
| Cl   | 3.55002476808868  | 1.23590100483459  | -0.35579880891105 |
| Cl   | -1.09332995032798 | -2.20027075644419 | -1.84638611153255 |

**Tab. S14:** xyz coordinates for the CI transition state between Het and Hom at B3LYP-D3(BJ)/def2-QZVP level.

| atom | x                 | y                 | z                 |
|------|-------------------|-------------------|-------------------|
| C    | 0.22026904588943  | -1.70535815300804 | 0.15664892906094  |
| C    | -0.57317365762934 | -0.63700635750357 | 0.55181634107913  |
| C    | -0.31339313868340 | -2.98585649228052 | 0.11950615346339  |
| H    | -0.15032537328589 | 0.35003992362927  | 0.58295605808670  |
| C    | -1.90380214101209 | -0.81580880373532 | 0.91440876418264  |
| C    | -1.63826512319288 | -3.19385988511339 | 0.48171030870243  |
| H    | -2.07284640082994 | -4.18179888085440 | 0.46228644064924  |
| C    | -2.41344861509292 | -2.11373000073731 | 0.87366880886662  |
| H    | 1.24942516249535  | -1.52806654612817 | -0.11825250664348 |
| C    | -2.77727269906314 | 0.33142582602089  | 1.33951907547822  |
| H    | -3.66877228620059 | 0.36022570792469  | 0.70755083240157  |
| H    | -3.11367941679333 | 0.17269390425479  | 2.36842825055746  |
| O    | -2.06789178686555 | 1.56742120303435  | 1.23895023399837  |
| H    | -2.67744531271474 | 2.28313895767752  | 1.43121289074536  |
| H    | 0.29349475894857  | -3.82533111388685 | -0.18817679712552 |
| C    | 3.51522381062125  | 0.31512009777380  | 0.85191416629359  |
| C    | 2.51973125279679  | 1.28280683812219  | 0.83392498146253  |
| C    | 3.94552716671741  | -0.26179424847153 | -0.33609083347162 |
| H    | 2.17283989710333  | 1.73498049883038  | 1.75082342154084  |
| C    | 1.93177294826921  | 1.69565848395341  | -0.35914245966331 |
| C    | 3.37858800275435  | 0.13478902961812  | -1.53984782976939 |
| H    | 3.69694749694482  | -0.29968431810184 | -2.47547085553313 |
| C    | 2.38616911400231  | 1.10451666442049  | -1.53693135836687 |
| H    | 3.95218977883740  | 0.01155699110470  | 1.79252804240334  |
| C    | 0.83864657030587  | 2.74534710219803  | -0.36891884936574 |
| H    | 1.22968126252234  | 3.66167537871488  | -0.81624731934873 |
| H    | 0.02249811756411  | 2.40900321430633  | -1.01279216009945 |
| O    | 0.36268581362825  | 3.07518074534808  | 0.92005980068199  |
| H    | -0.36414380624454 | 2.47756569870792  | 1.13980560223882  |
| H    | 4.71852781253645  | -1.01702339446120 | -0.33223110584485 |
| Cl   | -4.08023261146235 | -2.40148614526633 | 1.32953878340026  |
| Cl   | 1.69371776136956  | 1.58658925357691  | -3.07179757139671 |

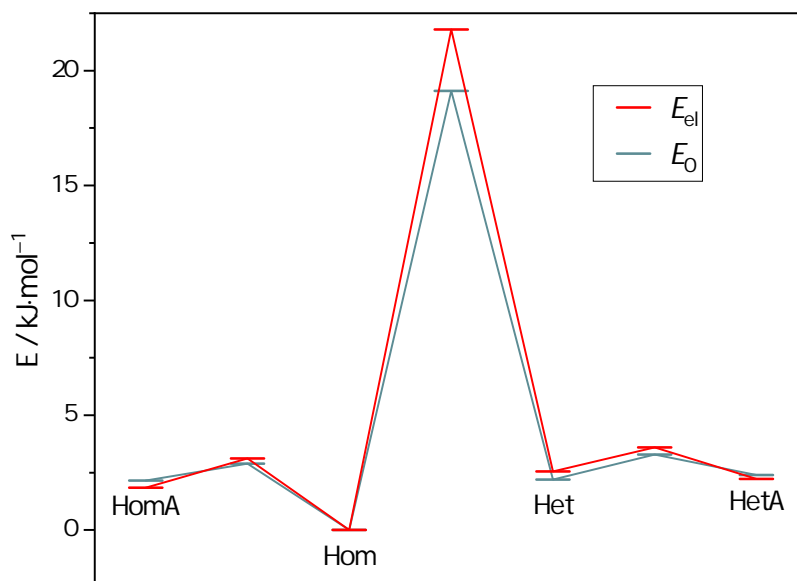

**Fig. S6:** Cl dimer energies and calculated transition state energies at B3LYP-D3(BJ)/def2-QZVP level with ( $E_0$ ) and without ZVPE ( $E_{el}$ ).

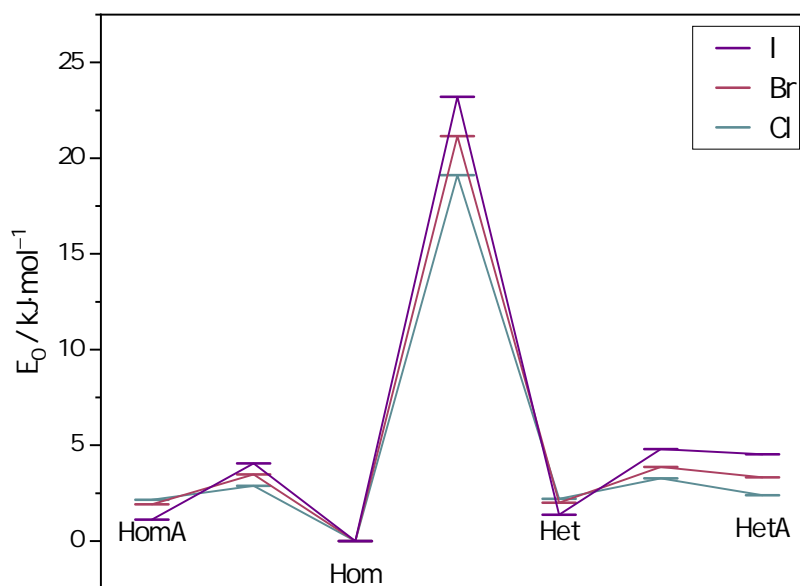

**Fig. S7:** Relative ZPVE-corrected energies and transition barriers between the four most stable dimers of Cl, Br, I, calculated at B3LYP-D3(BJ)/def2-QZVP level.

---

## 2 Experimental results

### 2.1 Measurement conditions

**Tab. S15:** Details for the measurement conditions of the shown spectra including the carrier gas, the temperature of the substance chamber  $T_{\text{Subst}}$ , the temperature of the nozzle  $T_{\text{Nozzle}}$  and the number of averaged scans #.

| Substance              | Carrier gas | $T_{\text{Subst}} / ^\circ\text{C}$ | $T_{\text{Nozzle}} / ^\circ\text{C}$ | #   | Figure   |
|------------------------|-------------|-------------------------------------|--------------------------------------|-----|----------|
| 2-Chlorobenzyl alcohol | He          | 70                                  | 90                                   | 482 | 11b, 13a |
| 2-Chlorobenzyl alcohol | He          | 80                                  | 100                                  | 149 | 12b      |
| 2-Chlorobenzyl alcohol | He+Ar       | 80                                  | 100                                  | 175 | 12a      |
| 2-Bromobenzyl alcohol  | He          | 90                                  | 110                                  | 375 | 13b      |
| 2-Iodobenzyl alcohol   | He          | 110                                 | 130                                  | 325 | 13c      |

### 2.2 Experimental and calculated band positions

In table S16 the experimentally observed band positions and assignments to the computed conformations are shown. Scaled harmonic band positions for monomers and dimers are also listed and, if applicable, compared to the experiment.

**Tab. S16:** Experimental band positions ( $\nu$ ), calculated band positions at B3LYP-D3(BJ)/def2-QZVP level ( $\omega_{\text{calc}}$ ), scaled band positions ( $\omega_{\text{scal}} = \omega_{\text{calc}} \cdot 0.96$ ), calculated IR intensity ( $I_{\text{calc}}$ ) and difference between experimental and scaled band positions ( $\Delta\omega = \omega_{\text{scal}} - \nu$ ). D is short for H-bond donor and A short for H-bond acceptor. The deviations between experiment and scaled harmonic theory are very systematic, supporting the proposed assignments.

| Substance | Assignment | Label                 | $\nu$<br>cm <sup>-1</sup> | $\omega_{\text{calc}}$<br>cm <sup>-1</sup> | $\omega_{\text{scal}}$<br>cm <sup>-1</sup> | $I_{\text{calc}}$<br>km mol <sup>-1</sup> | $\Delta\omega$<br>cm <sup>-1</sup> |
|-----------|------------|-----------------------|---------------------------|--------------------------------------------|--------------------------------------------|-------------------------------------------|------------------------------------|
| Cl        | Monomer    | G'g                   | 3636                      | 3799.5                                     | 3647.5                                     | 33                                        | +11.5                              |
|           |            | Tg                    | -                         | 3818.9                                     | 3666.1                                     | 33                                        | -                                  |
|           |            | Tt                    | 3687                      | 3849.6                                     | 3695.6                                     | 54                                        | +8.6                               |
|           | hom Dimer  | Tg-G'g <sub>D</sub>   | 3499                      | 3617.0                                     | 3472.2                                     | 425                                       | -26.8                              |
|           |            | Tg-G'g <sub>A</sub>   | -                         | 3778.4                                     | 3627.3                                     | 38                                        | -                                  |
|           |            | Tg-G'g-a <sub>D</sub> | -                         | 3624.1                                     | 3479.1                                     | 307                                       | -                                  |
|           | het Dimer  | Tg-G'g-a <sub>A</sub> | -                         | 3759.1                                     | 3608.7                                     | 64                                        | -                                  |
|           |            | Tg-Gg' <sub>D</sub>   | -                         | 3628.6                                     | 3483.5                                     | 476                                       | -                                  |
|           |            | Tg-Gg' <sub>A</sub>   | -                         | 3781.4                                     | 3630.1                                     | 44                                        | -                                  |
|           |            | Tg-Gg'-a <sub>D</sub> | -                         | 3614.2                                     | 3469.6                                     | 470                                       | -                                  |
|           |            | Tg-Gg'-a <sub>A</sub> | -                         | 3778.4                                     | 3627.3                                     | 54                                        | -                                  |
| Br        | Monomer    | G'g                   | 3626                      | 3788.0                                     | 3636.5                                     | 36                                        | +10.5                              |
|           |            | Tg                    | -                         | 3819.3                                     | 3666.5                                     | 35                                        | -                                  |
|           |            | Tt                    | 3688                      | 3849.7                                     | 3695.7                                     | 56                                        | +7.7                               |
|           | hom Dimer  | Tg-G'g <sub>D</sub>   | 3498                      | 3614.0                                     | 3469.4                                     | 436                                       | -28.6                              |
|           |            | Tg-G'g <sub>A</sub>   | -                         | 3762.3                                     | 3611.8                                     | 44                                        | -                                  |
|           |            | Tg-G'g-a <sub>D</sub> | -                         | 3622.9                                     | 3478.0                                     | 311                                       | -                                  |
|           | het Dimer  | Tg-G'g-a <sub>A</sub> | -                         | 3748.2                                     | 3598.3                                     | 66                                        | -                                  |
|           |            | Tg-Gg' <sub>D</sub>   | 3511                      | 3630.6                                     | 3485.4                                     | 475                                       | -25.6                              |
|           |            | Tg-Gg' <sub>A</sub>   | -                         | 3763.9                                     | 3613.3                                     | 50                                        | -                                  |
|           |            | Tg-Gg'-a <sub>D</sub> | -                         | 3612.7                                     | 3468.2                                     | 489                                       | -                                  |
|           |            | Tg-Gg'-a <sub>A</sub> | -                         | 3759.8                                     | 3609.4                                     | 64                                        | -                                  |
| I         | Monomer    | G'g                   | 3613                      | 3774.6                                     | 3623.6                                     | 39                                        | +10.6                              |
|           |            | Tg                    | -                         | 3818.5                                     | 3665.8                                     | 36                                        | -                                  |
|           |            | Tt                    | 3686                      | 3849.4                                     | 3695.4                                     | 57                                        | +9.4                               |
|           | hom Dimer  | Tg-G'g <sub>D</sub>   | 3498                      | 3614.9                                     | 3470.3                                     | 445                                       | -27.7                              |
|           |            | Tg-G'g <sub>A</sub>   | -                         | 3746.3                                     | 3596.4                                     | 51                                        | -                                  |
|           |            | Tg-G'g-a <sub>D</sub> | -                         | 3619.9                                     | 3475.1                                     | 309                                       | -                                  |
|           | het Dimer  | Tg-G'g-a <sub>A</sub> | -                         | 3733.0                                     | 3583.7                                     | 69                                        | -                                  |
|           |            | Tg-Gg' <sub>D</sub>   | 3510                      | 3627.2                                     | 3482.1                                     | 470                                       | -27.9                              |
|           |            | Tg-Gg' <sub>A</sub>   | -                         | 3747.6                                     | 3597.7                                     | 56                                        | -                                  |
|           |            | Tg-Gg'-a <sub>D</sub> | -                         | 3618.2                                     | 3473.5                                     | 511                                       | -                                  |
|           |            | Tg-Gg'-a <sub>A</sub> | -                         | 3742.4                                     | 3592.7                                     | 74                                        | -                                  |

---

## References

- (S1) Neese, F. Software update: The ORCA program system—Version 5.0. *WIREs Comput. Mol. Sci.* **2022**, *12*, e1606.
- (S2) Johnson, E. R.; Keinan, S.; Mori-Sánchez, P.; Contreras-García, J.; Cohen, A. J.; Yang, W. Revealing Noncovalent Interactions. *J. Am. Chem. Soc.* **2010**, *132*, 6498–6506.
- (S3) Lu, T.; Chen, F. Multiwfn: A multifunctional wavefunction analyzer. *J. Comput. Chem.* **2011**, *33*, 580–592.
- (S4) Humphrey, W.; Dalke, A.; Schulten, K. VMD: Visual molecular dynamics. *J. Mol. Graph.* **1996**, *14*, 33–38.
